# Supplementary material for: A Novel Effector FlSp1 Inhibits the Colonization of Endophytic Fusarium lateritium and Increases the Resistance to Ralstonia solanacearum in Tobacco
Source: MDPI journal article supplement (doi:10.3390/jof9050519), 2023-04-27
Supplement: s1 [file s1]

1        **Supplementary data**

2

3        **Article Title: A novel effector *FlSp1* inhibits the**

4        **colonization of endophytic *Fusarium lateritium***

5        **and increases the resistance to *Ralstonia***

6        ***solanacearum* in tobacco**

7

8        **Supplementary table 1.** Prediction and proportion of effectors.

9        **Supplementary table 2.** According to BLAST comparison of *F. lateritium*, 69 effectors are characterized

10        proteins.

11        **Supplementary Figure 1.** Knockout of *FlSp1* by homologous recombination strategy.

12        **Supplementary Figure 2.** *FlSp1* causes plant immune response but not leaf death.

13        **Supplementary Figure 3.** *FlSp1* does not affect tobacco growth.

14

15        **Supplementary Table S1.** Prediction and proportion of effectors

| Protein type          | Number | (%)Percent |
|-----------------------|--------|------------|
| Signal peptide        | 1502   | 10.17      |
| Transmembrane protein | 3114   | 21.1       |
| Secreted protein      | 1139   | 7.7        |
| Effector              | 213    | 1.4        |

16

17        **Supplementary Table S2.** According to BLAST comparison of *F. lateritium*, 69 effectors are

18        characterized proteins

| Number | Gene number  | (aa)Length | Effector<br>probability | Annotation      |
|--------|--------------|------------|-------------------------|-----------------|
| 1      | EVM0006333.1 | 177        | 0.844                   | uncharacterized |
| 2      | EVM0009636.1 | 176        | 0.643                   | uncharacterized |
| 3      | EVM0005471.1 | 246        | 0.648                   | uncharacterized |
| 4      | EVM0013370.1 | 318        | 0.581                   | uncharacterized |
| 5      | EVM0008733.1 | 108        | 0.638                   | uncharacterized |
| 6      | EVM0014116.1 | 193        | 0.67                    | uncharacterized |
| 7      | EVM0003410.1 | 137        | 0.695                   | uncharacterized |
| 8      | EVM0000423.1 | 102        | 0.786                   | uncharacterized |

|    |              |     |       |                 |
|----|--------------|-----|-------|-----------------|
| 9  | EVM0008355.1 | 270 | 0.624 | uncharacterized |
| 10 | EVM0006157.1 | 85  | 0.571 | uncharacterized |
| 11 | EVM0013819.1 | 170 | 0.603 | uncharacterized |
| 12 | EVM0012882.2 | 196 | 0.75  | characterized   |
| 13 | EVM0010567.1 | 304 | 0.648 | uncharacterized |
| 14 | EVM0002215.2 | 260 | 0.563 | characterized   |
| 15 | EVM0007040.1 | 65  | 0.91  | uncharacterized |
| 16 | EVM0001139.1 | 83  | 0.715 | uncharacterized |
| 17 | EVM0009597.1 | 189 | 0.66  | uncharacterized |
| 18 | EVM0013376.1 | 131 | 0.912 | uncharacterized |
| 19 | EVM0012156.1 | 219 | 0.86  | uncharacterized |
| 20 | EVM0010414.1 | 186 | 0.824 | characterized   |
| 21 | EVM0001349.1 | 220 | 0.777 | characterized   |
| 22 | EVM0007796.1 | 81  | 0.896 | uncharacterized |
| 23 | EVM0012723.1 | 278 | 0.581 | uncharacterized |
| 24 | EVM0012779.1 | 125 | 0.879 | uncharacterized |
| 25 | EVM0010980.1 | 184 | 0.756 | characterized   |
| 26 | EVM0012042.1 | 306 | 0.565 | characterized   |
| 27 | EVM0009179.1 | 324 | 0.567 | characterized   |
| 28 | EVM0005640.1 | 240 | 0.679 | characterized   |
| 29 | EVM0011395.1 | 148 | 0.909 | uncharacterized |
| 30 | EVM0002480.1 | 96  | 0.952 | uncharacterized |
| 31 | EVM0002922.1 | 147 | 0.794 | characterized   |
| 32 | EVM0004658.1 | 220 | 0.779 | uncharacterized |
| 33 | EVM0006367.1 | 226 | 0.699 | uncharacterized |
| 34 | EVM0006057.1 | 96  | 0.898 | uncharacterized |
| 35 | EVM0014039.1 | 129 | 0.826 | uncharacterized |
| 36 | EVM0001932.1 | 274 | 0.557 | characterized   |
| 37 | EVM0004347.1 | 151 | 0.783 | uncharacterized |
| 38 | EVM0007344.1 | 235 | 0.738 | uncharacterized |
| 39 | EVM0004957.1 | 98  | 0.948 | uncharacterized |
| 40 | EVM0007201.1 | 457 | 0.559 | uncharacterized |
| 41 | EVM0001500.1 | 226 | 0.647 | uncharacterized |
| 42 | EVM0011667.1 | 162 | 0.63  | uncharacterized |
| 43 | EVM0001735.1 | 147 | 0.58  | uncharacterized |
| 44 | EVM0005322.1 | 350 | 0.606 | characterized   |
| 45 | EVM0012487.1 | 237 | 0.828 | uncharacterized |
| 46 | EVM0014208.1 | 195 | 0.953 | characterized   |
| 47 | EVM0010877.1 | 129 | 0.846 | uncharacterized |
| 48 | EVM0012954.1 | 164 | 0.847 | uncharacterized |
| 49 | EVM0011510.1 | 149 | 0.899 | uncharacterized |
| 50 | EVM0001120.1 | 141 | 0.825 | uncharacterized |
| 51 | EVM0014610.1 | 319 | 0.682 | uncharacterized |
| 52 | EVM0001443.1 | 97  | 0.952 | uncharacterized |

|    |              |     |       |                 |
|----|--------------|-----|-------|-----------------|
| 53 | EVM0000057.1 | 322 | 0.555 | uncharacterized |
| 54 | EVM0001142.1 | 88  | 0.943 | uncharacterized |
| 55 | EVM0007002.1 | 97  | 0.965 | characterized   |
| 56 | EVM0014586.1 | 126 | 0.739 | uncharacterized |
| 57 | EVM0004505.1 | 243 | 0.676 | characterized   |
| 58 | EVM0003108.1 | 224 | 0.675 | characterized   |
| 59 | EVM0014328.1 | 221 | 0.787 | characterized   |
| 60 | EVM0006138.1 | 120 | 0.886 | uncharacterized |
| 61 | EVM0014498.1 | 199 | 0.867 | uncharacterized |
| 62 | EVM0014140.1 | 295 | 0.648 | characterized   |
| 63 | EVM0000294.1 | 378 | 0.597 | characterized   |
| 64 | EVM0002123.1 | 69  | 0.876 | characterized   |
| 65 | EVM0014671.1 | 175 | 0.583 | uncharacterized |
| 66 | EVM0001162.1 | 155 | 0.869 | uncharacterized |
| 67 | EVM0013657.1 | 322 | 0.613 | characterized   |
| 68 | EVM0005907.1 | 105 | 0.928 | uncharacterized |
| 69 | EVM0001402.1 | 169 | 0.577 | uncharacterized |
| 70 | EVM0005281.1 | 241 | 0.867 | characterized   |
| 71 | EVM0009167.1 | 166 | 0.611 | uncharacterized |
| 72 | EVM0005763.1 | 219 | 0.631 | characterized   |
| 73 | EVM0003868.1 | 165 | 0.858 | uncharacterized |
| 74 | EVM0008887.1 | 138 | 0.877 | characterized   |
| 75 | EVM0013489.1 | 245 | 0.623 | uncharacterized |
| 76 | EVM0012583.1 | 101 | 0.965 | characterized   |
| 77 | EVM0003173.1 | 375 | 0.622 | characterized   |
| 78 | EVM0009206.1 | 239 | 0.76  | characterized   |
| 79 | EVM0003594.1 | 148 | 0.81  | uncharacterized |
| 80 | EVM0007246.1 | 92  | 0.555 | uncharacterized |
| 81 | EVM0012131.1 | 52  | 0.857 | uncharacterized |
| 82 | EVM0006172.1 | 237 | 0.867 | characterized   |
| 83 | EVM0007284.1 | 208 | 0.802 | uncharacterized |
| 84 | EVM0001143.1 | 154 | 0.823 | characterized   |
| 85 | EVM0011315.1 | 257 | 0.683 | characterized   |
| 86 | EVM0012488.1 | 233 | 0.887 | characterized   |
| 87 | EVM0010962.2 | 183 | 0.872 | uncharacterized |
| 88 | EVM0002011.1 | 227 | 0.637 | uncharacterized |
| 89 | EVM0009437.1 | 396 | 0.698 | uncharacterized |
| 90 | EVM0013980.1 | 328 | 0.572 | characterized   |
| 91 | EVM0001537.1 | 210 | 0.69  | uncharacterized |
| 92 | EVM0005253.1 | 121 | 0.959 | uncharacterized |
| 93 | EVM0005607.1 | 70  | 0.657 | uncharacterized |
| 94 | EVM0006239.1 | 240 | 0.841 | characterized   |
| 95 | EVM0009658.1 | 359 | 0.589 | characterized   |
| 96 | EVM0011051.1 | 108 | 0.979 | uncharacterized |

|     |              |     |       |                 |
|-----|--------------|-----|-------|-----------------|
| 97  | EVM0010473.1 | 203 | 0.775 | uncharacterized |
| 98  | EVM0012330.1 | 232 | 0.925 | characterized   |
| 99  | EVM0006836.1 | 247 | 0.79  | uncharacterized |
| 100 | EVM0013359.1 | 362 | 0.551 | characterized   |
| 101 | EVM0005836.1 | 263 | 0.616 | characterized   |
| 102 | EVM0004362.1 | 239 | 0.938 | uncharacterized |
| 103 | EVM0010244.1 | 284 | 0.576 | uncharacterized |
| 104 | EVM0008735.1 | 203 | 0.807 | uncharacterized |
| 105 | EVM0007467.1 | 217 | 0.67  | uncharacterized |
| 106 | EVM0006213.1 | 294 | 0.574 | uncharacterized |
| 107 | EVM0013638.1 | 207 | 0.777 | uncharacterized |
| 108 | EVM0004519.1 | 265 | 0.664 | uncharacterized |
| 109 | EVM0014131.1 | 247 | 0.613 | uncharacterized |
| 110 | EVM0012687.1 | 233 | 0.586 | uncharacterized |
| 111 | EVM0002974.1 | 202 | 0.615 | uncharacterized |
| 112 | EVM0000091.1 | 103 | 0.69  | uncharacterized |
| 113 | EVM0007433.1 | 139 | 0.632 | characterized   |
| 114 | EVM0004198.1 | 170 | 0.81  | uncharacterized |
| 115 | EVM0004696.1 | 123 | 0.86  | characterized   |
| 116 | EVM0000945.1 | 210 | 0.637 | uncharacterized |
| 117 | EVM0007829.1 | 310 | 0.602 | uncharacterized |
| 118 | EVM0009670.1 | 190 | 0.673 | uncharacterized |
| 119 | EVM0003288.1 | 271 | 0.715 | uncharacterized |
| 120 | EVM0014406.1 | 298 | 0.603 | uncharacterized |
| 121 | EVM0002867.1 | 135 | 0.85  | uncharacterized |
| 122 | EVM0004583.1 | 129 | 0.879 | uncharacterized |
| 123 | EVM0004199.1 | 133 | 0.876 | uncharacterized |
| 124 | EVM0005146.1 | 138 | 0.813 | uncharacterized |
| 125 | EVM0010327.1 | 129 | 0.894 | uncharacterized |
| 126 | EVM0012892.1 | 339 | 0.804 | characterized   |
| 127 | EVM0008124.1 | 218 | 0.864 | characterized   |
| 128 | EVM0001445.1 | 140 | 0.909 | uncharacterized |
| 129 | EVM0007948.1 | 186 | 0.681 | characterized   |
| 130 | EVM0014535.1 | 169 | 0.667 | uncharacterized |
| 131 | EVM0012415.1 | 239 | 0.638 | uncharacterized |
| 132 | EVM0005891.1 | 224 | 0.91  | characterized   |
| 133 | EVM0005605.1 | 159 | 0.692 | uncharacterized |
| 134 | EVM0014710.1 | 266 | 0.661 | characterized   |
| 135 | EVM0012557.1 | 270 | 0.572 | uncharacterized |
| 136 | EVM0013223.1 | 124 | 0.704 | uncharacterized |
| 137 | EVM0003335.1 | 166 | 0.637 | uncharacterized |
| 138 | EVM0000889.1 | 183 | 0.869 | uncharacterized |
| 139 | EVM0010402.1 | 100 | 0.815 | uncharacterized |
| 140 | EVM0012384.1 | 217 | 0.726 | uncharacterized |

|     |              |     |       |                 |
|-----|--------------|-----|-------|-----------------|
| 141 | EVM0000095.1 | 257 | 0.748 | uncharacterized |
| 142 | EVM0006154.1 | 103 | 0.715 | uncharacterized |
| 143 | EVM0011042.1 | 125 | 0.816 | uncharacterized |
| 144 | EVM0009850.1 | 213 | 0.873 | characterized   |
| 145 | EVM0006803.1 | 113 | 0.589 | characterized   |
| 146 | EVM0009679.1 | 126 | 0.814 | characterized   |
| 147 | EVM0011201.1 | 263 | 0.619 | characterized   |
| 148 | EVM0003773.1 | 171 | 0.815 | uncharacterized |
| 149 | EVM0002915.1 | 144 | 0.667 | uncharacterized |
| 150 | EVM0003054.1 | 149 | 0.585 | uncharacterized |
| 151 | EVM0000104.1 | 89  | 0.952 | uncharacterized |
| 152 | EVM0012618.1 | 85  | 0.795 | uncharacterized |
| 153 | EVM0007631.1 | 114 | 0.756 | uncharacterized |
| 154 | EVM0013159.1 | 154 | 0.66  | characterized   |
| 155 | EVM0012550.1 | 319 | 0.656 | characterized   |
| 156 | EVM0000795.1 | 192 | 0.708 | uncharacterized |
| 157 | EVM0008422.1 | 252 | 0.662 | uncharacterized |
| 158 | EVM0004881.1 | 338 | 0.713 | characterized   |
| 159 | EVM0012941.1 | 114 | 0.86  | uncharacterized |
| 160 | EVM0009692.1 | 287 | 0.604 | uncharacterized |
| 161 | EVM0008930.1 | 123 | 0.906 | uncharacterized |
| 162 | EVM0013634.1 | 132 | 0.854 | uncharacterized |
| 163 | EVM0004563.1 | 147 | 0.94  | uncharacterized |
| 164 | EVM0010345.1 | 231 | 0.594 | characterized   |
| 165 | EVM0014036.1 | 230 | 0.584 | characterized   |
| 166 | EVM0005533.1 | 181 | 0.788 | uncharacterized |
| 167 | EVM0000223.1 | 180 | 0.741 | uncharacterized |
| 168 | EVM0004854.1 | 184 | 0.669 | uncharacterized |
| 169 | EVM0007488.1 | 355 | 0.712 | characterized   |
| 170 | EVM0004195.1 | 242 | 0.742 | characterized   |
| 171 | EVM0012907.1 | 148 | 0.606 | uncharacterized |
| 172 | EVM0008347.1 | 254 | 0.822 | characterized   |
| 173 | EVM0003893.1 | 181 | 0.61  | uncharacterized |
| 174 | EVM0002443.1 | 330 | 0.616 | uncharacterized |
| 175 | EVM0011077.1 | 292 | 0.594 | uncharacterized |
| 176 | EVM0006417.1 | 138 | 0.615 | uncharacterized |
| 177 | EVM0009264.1 | 142 | 0.802 | characterized   |
| 178 | EVM0013140.1 | 247 | 0.706 | characterized   |
| 179 | EVM0005593.1 | 468 | 0.568 | characterized   |
| 180 | EVM0005092.1 | 235 | 0.572 | uncharacterized |
| 181 | EVM0009607.1 | 147 | 0.672 | characterized   |
| 182 | EVM0010696.1 | 191 | 0.788 | uncharacterized |
| 183 | EVM0008599.2 | 239 | 0.856 | characterized   |
| 184 | EVM0002391.1 | 230 | 0.883 | uncharacterized |

|     |              |     |       |                 |
|-----|--------------|-----|-------|-----------------|
| 185 | EVM0003581.1 | 89  | 0.551 | uncharacterized |
| 186 | EVM0004871.1 | 253 | 0.828 | characterized   |
| 187 | EVM0013936.1 | 123 | 0.811 | uncharacterized |
| 188 | EVM0000278.1 | 126 | 0.839 | characterized   |
| 189 | EVM0004856.1 | 127 | 0.768 | uncharacterized |
| 190 | EVM0005781.1 | 152 | 0.972 | uncharacterized |
| 191 | EVM0007080.1 | 122 | 0.81  | uncharacterized |
| 192 | EVM0008550.1 | 298 | 0.551 | characterized   |
| 193 | EVM0005978.1 | 251 | 0.581 | characterized   |
| 194 | EVM0003690.1 | 265 | 0.571 | uncharacterized |
| 195 | EVM0008652.1 | 113 | 0.838 | uncharacterized |
| 196 | EVM0003861.1 | 94  | 0.966 | uncharacterized |
| 197 | EVM0006459.1 | 115 | 0.868 | uncharacterized |
| 198 | EVM0013983.1 | 266 | 0.609 | uncharacterized |
| 199 | EVM0013145.1 | 236 | 0.857 | uncharacterized |
| 200 | EVM0000497.1 | 241 | 0.902 | characterized   |
| 201 | EVM0011643.1 | 231 | 0.717 | characterized   |
| 202 | EVM0004101.1 | 106 | 0.906 | uncharacterized |
| 203 | EVM0013655.1 | 204 | 0.855 | characterized   |
| 204 | EVM0013306.1 | 63  | 0.77  | uncharacterized |
| 205 | EVM0009868.1 | 137 | 0.944 | uncharacterized |
| 206 | EVM0001748.1 | 170 | 0.76  | uncharacterized |
| 207 | EVM0003744.1 | 71  | 0.769 | uncharacterized |
| 208 | EVM0001829.1 | 145 | 0.921 | uncharacterized |
| 209 | EVM0011186.1 | 144 | 0.931 | uncharacterized |
| 210 | EVM0010618.1 | 98  | 0.769 | characterized   |
| 211 | EVM0000822.1 | 259 | 0.6   | characterized   |
| 212 | EVM0014202.1 | 127 | 0.971 | uncharacterized |
| 213 | EVM0005809.1 | 124 | 0.949 | uncharacterized |

19

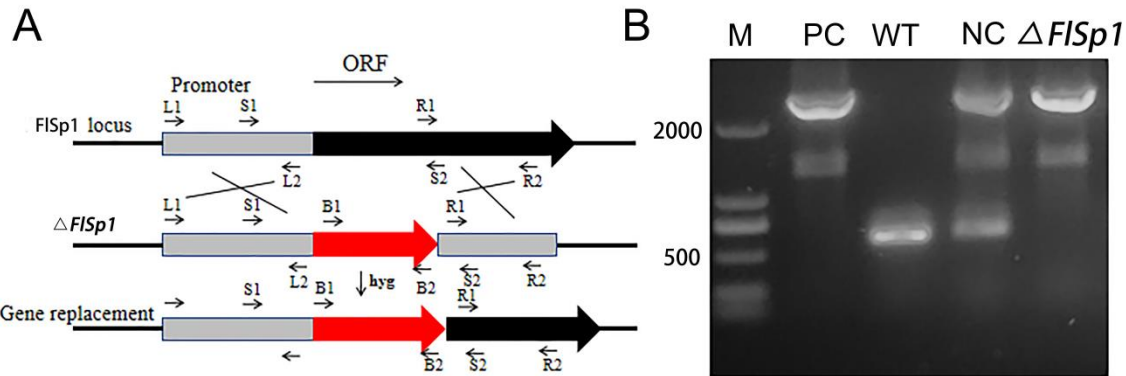

20

21 **Supplementary Figure S1.** Knockout of *FISp1* by homologous recombination strategy. (A)

22 Schematic representation of the replacement of *FISp1* sequence by homologous recombination

23 with GDPA+hyg fragment (1778 bp). (B) Validation of *FISp1* knockout transformants. By

24 designing primers at 260 bp position upstream and downstream of the FIS1 gene sequence

25 and performing PCR amplification, the transformants with unsuccessful homologous  
26 recombination could amplify a bright band of about 570 bp, and the transformants with  
27 normal knockdown of *FISp1* could amplify a bright band of about 2348 bp.  
28

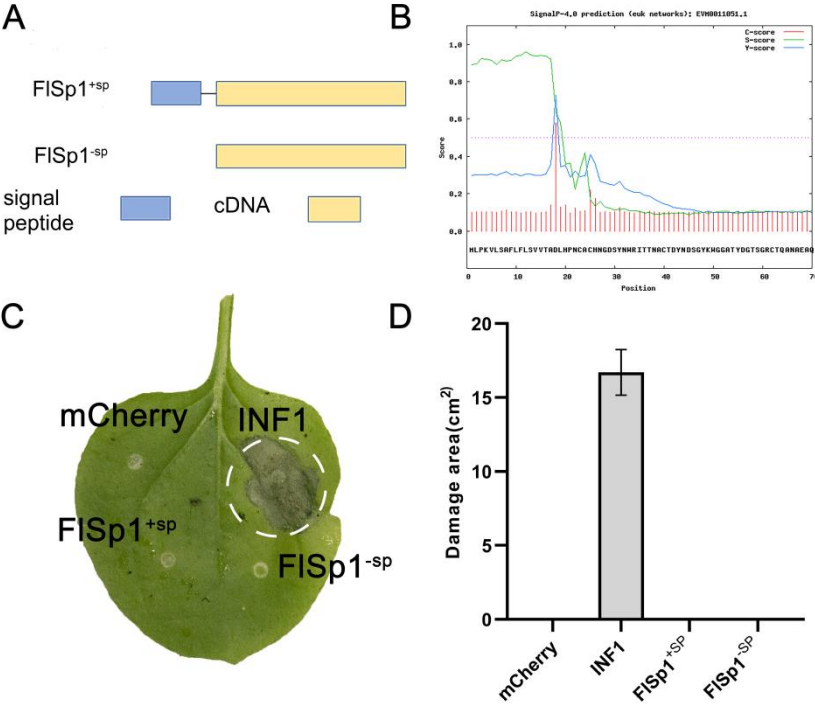

29  
30 **Supplementary Figure S2.** *FISp1* causes plant immune response but not leaf death. (A-B)  
31 Schematic diagram of *FISp1* amino acid sequence. The blue area indicates the signal peptide  
32 position, which is at 1-17 aa (C) Neither *FISp1*<sup>+sp</sup> nor *FISp1*<sup>-sp</sup> caused death in plant leaves.  
33 mCherry is the negative control and INF1 is the positive control (D) Statistics of leaf death  
34 area after transient expression.

35

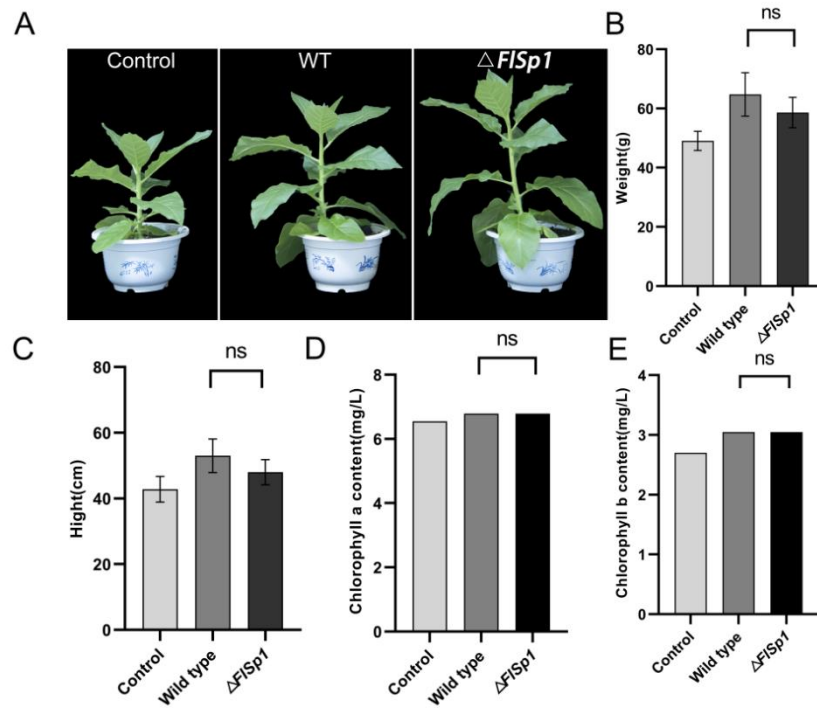

36

37 **Supplementary Figure S3.** *FISP1* does not affect tobacco growth. (A) *FISP1* does not affect the  
 38 growth of plants. (B-E) After 14 d of incubation, plant fresh weight, plant height, and  
 39 chlorophyll a and chlorophyll b contained in leaves were counted for each treatment. Eight  
 40 replicates were set up for each experiment, and three experiments were conducted.

41
